# Supplementary material for: Lessons from the Effective Implementation of a Hybrid Virtual Clinical Model for Surgical Clerkships during the Covid Pandemic: Impact on Academic Performance, Burnout and Surgical Interest
Source: Research Square preprint supplement (doi:10.21203/rs.3.rs-110618/v1), 2020-12-02
Supplement: Supplementary file 1 [file a9090c6961ad254513234d8f.docx]

**Supplemental information**

**Supplemental Table 1**

| **Table 1** Virtual surgical clerkship contents | |
| --- | --- |
| Week 1 | **Course introduction**   - Personal protection equipment (PPE) workshop - Sutures workshop - Nasogastric tube and Foley Catheters workshops - Airway & ventilation workshop |
| Week 2 | **Introduction to the operating room**   - Operating room safety - Behavior in the operating room - Instrumentation - Perioperative indications - Surgical complications |
| Week 3 | **Wound healing**  **Acute abdomen**  **Basic principles of anesthesiology** |
| Week 4 | **Acute appendicitis**  **Hernia**  **Gallbladder** |
| Week 5 | **Colon**   - Anatomy, physiology, benign, malignant, screening & prognosis   **Perianal disease**   - Hemorrhoids, abscess, fistula, pilonidal cyst   **Bowel obstruction**   - Small & large |
| Week 6 | **Trauma**   - Polytrauma - Abdominal (blunt and penetrating) - Thoracic trauma   **Burns** |
| Week 7 | **Midterm exam**  **Liver**   - Portal hypertension - Abscess   **Transplants** |
| Week 8 | **Breast**   - Anatomy, physiology, benign & malignant - Screening, treatment & prognosis   **Thyroid**   - Anatomy, physiology, benign & malignant - Screening, treatment & prognosis |
| Week 9 | **Esophagus**   - Perforation, diverticula, GERD, hiatal hernia, anti-reflux surgery   **Stomach**   - Peptic ulcer disease, upper GIT bleeding, endoscopy   **Pancreas**   - Acute & chronic pancreatitis - Pancreatic cancer & surgical treatment |
| Week 10 | **Arterial peripheral system**   - Aneurysms, aortic dissection, acute limb ischemia, arterial ulcers, peripheral artery disease, thoracic outlet syndrome   **Venous peripheral system**   - Venous ulcers, primary venous insufficiency, Leriche’s Syndrome, Paget-Schroetter’s Syndrome |
| Week 11 | **Bariatric surgery**  **Thoracic surgery**   - Pleural effusion, solitary pulmonary nodule, pneumothorax, CABG |
| Week 12 | **Final exam** |

**Sup. Table 1.** 12-week contents of the academic program for the surgical clerkship

**Supplemental Table 2**. Sample weekly schedule.

| **Monday** | **Tuesday** | **Wednesday** | **Thursday** | **Friday** |
| --- | --- | --- | --- | --- |
| **07:00-08:30**  Virtual Grand Rounds with Residents and Attendings | **07:00-08:30**  Virtual Grand Rounds with Residents and Attendings | **07:00-08:30**  Virtual Grand Rounds with Residents and Attendings | **“Academic Day”** | **07:00-08:30**  Virtual Grand Rounds with Residents and Attendings |
|  |  |  |  |
| **10:30**  Critical Clinical Thinking Cases | **10:30**  Lessons/Class by Expert Surgeon | **10:30**  Critical Clinical Thinking Cases | **10:30**  Critical Clinical Thinking Cases |
|  |  |  |  |
| **12:00 - 13:30**  Resident Session | **12:00 - 13:30**  Resident Session | **10:30**  Lessons/Class by Expert Surgeon | **12:00 - 13:30**  Resident Session |
| **14:00**  Virtual Handoff | **14:00**  **Tumor Board** | **14:00**  Virtual Handoff | **14:00**  Virtual Handoff |
| **15:30**  Surgical Case Demonstration |  | **15:30**  Surgical Case Demonstration |  |

**Sup. Table 2**. Weekly administration and scheduling of classes and activities.
